# Supplementary material for: Competing endogenous RNA network identifies mRNA biomarkers for overall survival of lung adenocarcinoma: two novel on-line precision medicine predictive tools
Source: PeerJ journal article supplement (doi:10.7717/peerj.11412), 2021-05-07
Supplement: validation_dataset.xlsx [file validation_dataset.xlsx]

## Sheet: Sheet 1
	OS_MONTH	OS	Age	Gender	Stage	TSPAN6	TNMD	DPM1	SCYL3	C1orf112	FGR	CFH	FUCA2	GCLC	NFYA	MCM4	CREBRF	KAT2B	NPAS2	DLGAP5	TGFBR2	RORA	LPGAT1	TRPC3	DCBLD2	EGLN3	BTG2	KPNA2	DEPDC1	KIF23	CCDC58	VAMP2	BEX4	OGT	CRY2	GATA2	FSCN1	PTGFRN	TMEM170B	SHCBP1	LIFR	AHNAK2	RRM2	PFKP	SEMA4B	YWHAZ	INPP5A	NETO2	DPYSL2
GSM1213739	1.44	0	74.91	0	1	0	0	0	0	0	1	1	0	0	0	0	1	0	1	0	0	0	0	1	0	0	1	0	1	0	0	0	0	0	1	1	1	0	1	0	1	0	0	0	0	0	0	0	0
GSM1213753	37.08	1	80.78	0	1	0	0	0	1	1	0	0	0	0	0	0	0	0	0	0	0	0	1	0	0	0	1	0	0	0	0	0	1	1	1	0	0	0	0	0	0	0	0	0	1	0	1	0	1
GSM1213779	37.32	0	73.02	0	1	1	0	0	1	0	1	0	0	1	1	0	1	1	0	0	1	1	0	1	0	0	1	0	0	0	0	0	1	1	1	0	0	0	0	0	1	0	0	0	0	1	1	0	1
GSM1213846	3.72	1	75.58	1	1	0	0	1	0	1	1	1	1	1	1	0	1	1	0	1	1	0	1	1	0	1	1	1	0	1	1	0	1	1	0	0	1	0	1	1	1	1	1	1	1	1	1	1	1
GSM1213758	66.12	0	61.98	1	1	0	0	0	0	0	0	1	0	1	0	0	1	1	1	0	1	1	0	1	0	0	1	0	0	0	0	1	1	0	1	1	1	0	0	0	1	1	0	0	0	0	1	0	1
GSM1019183	19.7	1	71	0	1	1	1	1	1	1	1	0	1	0	1	0	1	0	0	1	0	0	0	1	0	0	1	1	1	1	1	1	1	1	1	0	0	0	1	1	1	0	0	0	0	0	1	1	0
GSM1213679	75.72	0	66.46	1	1	0	0	1	1	0	1	1	1	1	0	0	1	1	0	0	1	1	0	1	0	1	1	0	0	0	1	0	1	0	1	1	0	0	1	0	1	1	0	0	0	0	1	0	1
GSM1019268	81.6	0	51	0	1	1	1	1	0	0	0	0	1	0	0	0	0	0	0	0	1	0	0	1	1	1	1	0	0	0	0	0	1	1	1	1	0	0	1	1	0	0	1	0	1	1	0	0	1
GSM1213847	99.12	0	76.07	1	1	1	0	1	1	0	1	1	0	0	1	0	1	1	1	0	1	1	0	0	0	0	1	0	0	0	1	1	1	1	0	0	0	0	1	0	1	0	0	1	0	0	1	1	1
GSM1213689	59.4	0	77.18	0	1	0	1	0	0	1	1	1	0	0	1	0	0	0	0	1	1	0	0	1	0	0	1	1	0	0	0	1	1	0	1	1	0	0	1	1	1	0	1	0	0	0	0	1	1
GSM1213761	59.16	0	63.1	0	1	1	1	0	0	0	0	0	0	0	0	1	1	0	0	0	1	0	0	1	0	0	1	0	1	0	0	1	1	0	1	0	0	0	1	0	1	0	0	1	0	1	1	1	0
GSM1019228	169.4	0	62	0	1	1	1	0	1	0	1	1	0	0	1	0	1	1	0	0	1	0	0	1	0	0	0	0	0	0	0	1	0	1	1	1	0	0	0	1	1	0	0	1	0	0	1	1	1
GSM1019190	120.7	0	66	0	1	0	1	0	1	0	1	1	0	0	0	0	1	1	0	0	1	0	0	1	0	0	1	0	0	0	0	1	1	0	1	1	0	1	0	0	1	0	0	0	0	0	1	0	1
GSM1213697	76.44	0	79.71	1	1	1	0	1	1	0	1	1	1	1	0	0	1	1	0	0	1	1	0	1	0	0	1	0	0	0	0	0	1	0	0	0	0	0	1	0	0	0	0	1	0	1	0	1	0
GSM1213747	49.56	0	57.09	0	2	1	0	1	1	1	0	0	1	0	1	0	0	1	0	1	0	1	0	0	1	0	1	1	1	1	0	0	1	1	1	0	0	0	0	1	1	1	0	0	0	0	1	1	1
GSM1213825	88.56	0	64.13	0	1	0	0	0	1	0	1	1	0	0	0	0	1	0	0	0	1	1	0	0	1	0	1	0	0	0	0	1	1	0	1	1	0	0	0	0	1	0	0	0	0	0	1	1	1
GSM1213787	41.16	0	71.22	0	1	0	0	1	1	0	1	1	1	1	0	0	1	1	1	0	1	1	0	1	0	1	1	0	0	0	0	1	1	1	0	1	0	1	0	1	1	0	1	1	0	0	0	0	1
GSM1019244	41.4333	1	59	1	1	0	1	0	1	0	0	0	0	0	0	0	1	1	0	0	1	0	0	0	1	0	1	0	0	0	0	0	1	1	1	1	0	0	1	0	1	0	0	0	1	0	0	1	1
GSM1019189	100	1	67	0	1	0	1	0	1	1	0	0	0	0	1	1	1	0	0	1	0	0	1	0	0	0	0	1	1	1	1	1	0	0	1	0	0	0	1	0	0	0	1	0	1	0	0	1	0
GSM1213808	60	0	48.8	0	1	1	0	1	1	1	0	1	0	0	0	0	1	1	0	0	1	1	0	0	0	0	0	0	0	0	1	1	1	1	1	0	0	0	1	0	1	0	0	0	0	0	1	1	1
GSM1019316	48.1667	1	61	1	1	1	1	1	1	1	1	0	1	1	0	1	0	0	0	0	0	1	0	0	0	1	0	1	1	1	1	0	1	1	1	1	0	0	1	0	1	1	1	0	1	1	0	1	0
GSM1213811	16.44	0	62.68	1	2	0	0	1	1	0	1	0	0	0	1	1	1	1	0	0	1	0	1	0	1	0	1	1	0	0	1	1	1	1	0	1	0	0	0	0	0	1	1	1	0	1	1	0	1
GSM1213827	50.04	0	61.13	1	1	0	0	1	0	1	0	0	1	1	0	1	0	0	1	1	0	1	0	0	0	0	1	1	1	1	1	1	0	0	0	0	0	0	0	1	1	0	1	1	1	1	0	0	0
GSM1019227	15.5667	1	53	1	1	1	0	1	0	1	0	1	0	1	0	1	0	0	0	1	0	0	1	1	0	1	0	1	1	1	0	0	0	1	0	0	1	1	0	1	0	1	1	0	1	1	1	1	0
GSM1213696	62.16	0	67.04	1	1	1	0	1	1	1	0	1	0	1	1	0	1	1	0	0	1	0	0	1	0	0	1	0	0	0	0	0	1	1	1	0	0	1	1	0	0	0	0	0	0	0	1	1	1
GSM1019282	50.7667	1	64	1	1	1	0	1	0	1	0	0	0	0	1	1	0	0	0	1	0	1	0	1	0	1	0	1	1	1	1	0	1	1	0	0	0	0	1	0	0	0	1	0	0	0	0	1	0
GSM1213798	130.56	0	75.03	1	1	1	1	0	1	0	0	0	1	1	1	0	0	0	0	0	0	0	0	0	0	0	1	0	0	0	0	1	0	0	1	0	0	1	1	0	0	1	0	0	1	1	1	0	1
GSM1213845	14.4	1	71.84	0	2	0	1	0	0	0	1	0	0	0	0	0	0	0	0	1	0	0	0	1	0	0	0	0	1	1	0	0	0	1	1	1	1	0	0	0	0	1	0	0	0	0	1	0	0
GSM1213784	62.4	0	66.38	1	1	1	0	0	0	0	0	0	0	0	0	1	1	0	1	0	0	0	0	0	0	1	1	0	1	1	0	1	0	1	1	0	0	1	1	1	1	0	0	0	1	0	1	1	1
GSM1019171	108.667	1	72	0	1	1	0	1	0	0	1	1	0	1	1	0	1	1	0	0	1	0	1	1	0	0	0	0	0	0	0	1	1	1	1	1	0	0	1	0	1	0	0	0	0	0	0	0	1
GSM1019159	3.63333	1	53	1	1	1	1	1	1	1	0	0	1	0	1	1	0	1	1	1	0	1	0	1	1	0	0	1	1	1	1	1	1	1	1	1	1	1	1	1	0	0	1	1	0	1	1	1	1
GSM1213699	22.56	1	61.13	1	1	0	0	1	1	1	1	1	0	0	1	0	1	1	0	0	1	1	0	0	0	0	0	0	0	0	1	0	1	0	1	0	0	0	1	0	1	0	0	0	0	1	0	0	1
GSM1213794	59.88	0	56.71	0	1	0	1	1	1	1	0	0	0	0	0	0	1	1	0	0	1	1	0	0	0	0	1	1	0	0	0	0	1	1	1	0	0	0	1	0	1	0	0	0	0	0	0	0	1
GSM1213690	61.44	0	78.96	0	2	1	1	0	1	1	1	1	1	1	1	0	0	1	0	0	0	1	0	1	0	1	0	0	0	0	1	1	1	1	1	0	0	0	1	0	1	1	0	1	0	1	1	0	1
GSM1019201	164.833	0	57	0	1	1	1	0	0	0	0	0	0	1	0	1	0	0	1	1	0	1	0	1	0	0	1	0	1	0	0	1	1	0	0	1	1	1	0	1	0	1	1	1	1	1	1	0	0
GSM1213785	46.68	1	73.63	1	1	0	0	0	0	0	0	0	0	1	0	1	1	0	0	1	0	1	0	1	0	0	1	0	1	1	0	1	0	1	0	1	0	0	1	0	0	0	0	1	0	0	0	0	0
GSM1019162	11.8333	1	70	0	1	1	1	0	1	1	1	1	1	0	1	0	1	1	0	1	1	0	1	0	1	0	1	0	0	0	0	0	1	1	0	0	1	0	0	0	1	0	0	1	0	1	1	0	1
GSM1019223	12.9	1	54	1	1	1	1	0	0	0	1	0	1	1	1	0	1	1	0	1	1	1	0	1	0	0	1	1	0	0	0	1	0	0	0	0	0	0	1	1	0	0	0	1	1	0	1	0	0
GSM1213769	63.48	0	57.75	0	1	1	1	0	1	1	1	1	0	1	1	0	0	0	0	0	1	0	0	0	0	0	1	0	0	0	0	1	1	0	1	1	1	1	0	0	0	0	0	0	0	0	1	0	1
GSM1019292	39.3667	1	54	0	3	0	0	1	1	1	0	0	1	1	0	1	0	1	0	1	0	1	1	0	1	0	0	1	1	1	1	0	0	1	0	1	0	0	1	0	1	0	1	1	0	0	0	1	0
GSM1213741	76.2	1	80.61	1	1	1	1	0	1	0	0	1	0	0	1	0	1	0	0	0	1	1	0	0	0	0	0	0	0	0	0	1	1	0	1	1	0	0	0	0	1	0	0	0	1	0	1	0	1
GSM1213781	21.6	1	70.96	1	2	0	1	0	0	0	1	1	1	1	1	0	1	1	1	0	1	1	0	1	1	1	0	0	0	0	0	1	0	0	1	0	1	1	0	0	0	1	0	1	0	0	1	0	1
GSM1213764	93	0	63.54	0	1	1	0	0	0	0	1	0	1	0	0	0	0	0	1	0	0	0	0	1	0	0	1	0	1	0	0	1	1	0	1	1	1	1	0	0	0	1	0	0	1	0	1	0	0
GSM1019164	9.53333	1	70	0	2	0	0	1	0	0	1	0	1	0	1	0	0	1	0	1	1	1	0	0	0	1	1	0	0	0	0	1	1	1	0	0	0	0	1	0	1	0	1	1	1	1	1	0	1
GSM1213738	46.2	1	63.5	1	2	1	1	0	1	0	0	1	1	1	0	0	0	0	1	0	0	0	1	0	0	1	1	0	0	0	1	1	1	0	1	0	0	0	1	0	0	0	0	0	1	1	0	1	0
GSM1213694	80.28	0	68.66	0	2	0	1	1	0	0	0	1	0	0	0	0	1	1	0	0	1	1	1	0	1	1	0	0	1	1	0	1	0	0	1	0	1	1	1	1	1	1	1	0	0	0	0	1	1
GSM1019243	34.3667	1	52	0	1	0	0	1	1	1	1	0	1	1	0	1	0	0	0	0	1	0	0	0	0	1	0	1	1	0	1	0	0	0	0	0	0	0	1	1	1	0	1	0	0	1	0	1	0
GSM1213795	80.04	0	60.29	0	1	0	1	0	1	1	1	1	0	0	1	0	1	0	1	0	1	1	0	0	1	0	1	1	0	0	0	1	1	1	1	1	1	0	0	0	1	0	0	0	0	0	1	0	1
GSM1213724	75.36	0	76.91	1	1	0	0	1	1	0	0	1	0	0	0	0	1	1	0	0	0	1	1	1	0	0	0	1	0	0	1	1	0	0	1	1	0	0	1	0	1	0	0	0	0	1	0	1	1
GSM1213685	81.12	0	52.14	1	1	0	0	1	1	0	0	1	0	0	1	0	1	1	0	0	1	1	1	1	0	0	0	0	0	0	1	0	1	1	1	0	0	0	1	0	1	0	0	0	0	1	1	0	1
GSM1019152	17.4333	1	51	0	1	1	1	1	0	1	0	1	1	0	1	0	0	0	0	1	1	0	0	0	1	0	0	1	1	1	0	0	1	1	0	0	1	0	1	1	0	0	0	0	0	0	1	0	0
GSM1019213	149.633	0	68	0	3	0	1	1	0	1	1	0	1	0	1	1	0	1	0	1	1	0	0	1	1	0	0	1	1	0	1	1	0	1	1	1	1	0	0	1	0	0	1	1	1	1	0	1	1
GSM1019234	68.9333	1	70	1	2	1	1	1	0	1	0	0	1	0	1	1	0	0	0	1	1	1	0	0	0	1	1	1	1	1	0	0	1	1	0	1	0	1	1	1	1	0	1	0	1	1	1	0	1
GSM1213752	11.64	1	64.73	1	1	0	1	0	1	0	0	0	0	0	1	0	0	0	0	0	1	0	0	1	0	0	1	0	0	0	0	0	0	1	1	0	0	0	0	0	0	1	0	0	1	0	1	0	1
GSM1213800	6.12	0	84.48	0	1	1	0	0	1	0	1	1	0	1	0	0	1	1	0	0	0	1	1	1	1	1	0	0	1	1	0	1	1	1	1	1	1	1	1	0	1	1	0	0	0	0	0	0	0
GSM1019197	6.53333	1	64	0	2	0	1	1	1	1	0	0	0	1	1	1	0	0	0	1	0	0	0	1	0	0	1	1	1	1	1	0	0	0	1	0	1	1	1	1	1	0	1	1	0	1	1	1	1
GSM1213782	38.52	0	74.74	1	1	1	0	1	1	0	0	1	0	1	1	0	1	1	0	0	1	1	1	1	0	0	0	0	0	0	1	1	1	1	1	0	0	1	1	0	1	1	0	0	1	1	0	0	1
GSM1213770	25.32	1	68.59	1	2	0	1	0	0	0	1	0	1	1	0	1	1	1	0	0	0	1	0	1	0	0	1	1	1	0	0	1	0	0	0	1	1	0	0	0	0	1	0	0	0	0	0	0	0
GSM1019320	49.6	1	69	1	1	0	1	0	1	0	0	1	1	0	0	0	1	1	0	0	1	1	1	1	1	0	1	0	0	0	0	1	1	1	1	1	0	0	1	0	1	0	0	1	0	0	1	0	1
GSM1019242	107.567	0	62	0	1	0	0	0	1	0	1	1	0	0	0	0	1	1	1	0	1	1	1	1	1	0	1	0	0	0	0	1	1	0	1	1	0	0	1	0	1	1	0	0	0	0	1	0	1
GSM1213715	88.32	0	72.97	0	2	1	0	0	0	1	0	0	1	1	1	1	0	0	1	1	0	0	0	1	0	0	0	1	1	1	1	0	1	1	0	0	1	1	1	1	0	0	1	1	0	1	0	1	0
GSM1019206	9.36667	1	67	0	3	0	0	1	1	0	0	0	0	1	0	0	1	0	1	1	0	1	0	1	0	0	1	0	0	1	0	1	0	1	0	0	1	1	0	0	0	1	0	0	1	1	1	0	0
GSM1019165	5.03333	1	60	0	1	1	1	0	0	0	1	0	1	0	0	0	1	1	0	0	1	0	1	1	0	0	0	0	0	0	0	1	1	1	1	0	0	0	0	0	1	0	0	1	0	0	0	0	0
GSM1213743	60.36	0	40.16	0	1	0	1	0	0	0	1	0	1	0	0	0	0	0	0	0	0	1	0	1	0	0	1	0	1	0	0	1	1	0	1	1	0	1	1	0	0	0	0	0	0	0	1	0	1
GSM1019163	2.93333	1	70	0	1	0	0	0	1	0	0	1	1	0	1	0	1	1	1	0	1	0	0	1	0	1	0	0	0	0	0	0	0	0	0	1	0	0	0	0	0	1	0	0	1	1	1	0	1
GSM1019144	10.1333	1	51	0	2	0	1	0	0	0	1	0	1	0	1	0	0	0	0	0	1	0	0	1	0	1	1	0	0	0	0	1	0	1	1	1	1	0	0	0	0	1	0	0	1	0	1	0	0
GSM1019188	124.1	0	55	0	1	1	1	0	1	0	0	0	1	0	0	0	0	0	0	0	0	0	0	0	0	0	1	0	0	0	1	1	1	0	1	0	0	0	1	0	1	0	0	0	0	0	0	1	1
GSM1019169	115.667	1	47	0	2	0	1	0	1	0	0	1	0	0	1	1	1	1	1	0	1	0	1	1	1	0	1	1	0	0	1	0	0	1	1	0	1	0	1	0	0	0	0	1	0	1	1	0	1
GSM1213768	52.08	0	60.6	1	1	0	1	0	0	1	0	0	1	0	0	1	0	0	1	0	0	0	0	1	0	1	1	0	1	0	0	0	0	0	1	1	0	0	0	0	0	0	0	1	1	0	1	0	0
GSM1019258	72.3333	1	75	0	1	0	1	0	1	0	1	1	0	0	0	0	1	1	0	0	1	1	1	0	1	0	1	0	0	0	1	1	1	0	1	1	0	0	1	0	1	0	0	0	0	0	0	1	1
GSM1019158	16.3333	1	66	1	2	1	0	0	1	1	0	1	1	1	1	0	0	0	1	0	1	0	0	1	1	0	0	0	0	0	0	1	0	0	1	0	1	1	1	1	0	1	1	1	0	0	1	1	1
GSM1019300	45.5667	1	66	0	1	0	0	0	1	0	0	0	1	0	0	0	1	1	1	0	1	0	0	1	0	1	0	0	0	0	0	0	0	0	1	0	0	0	0	0	1	1	0	0	1	1	0	0	1
GSM1019199	91.3	1	55	0	1	1	0	0	0	1	1	0	0	1	1	1	0	0	0	1	0	1	0	1	0	0	0	1	1	1	1	0	1	0	0	1	1	1	1	0	0	0	1	0	0	1	0	1	0
GSM1213777	65.4	0	66.69	1	1	0	1	0	0	1	0	0	1	0	0	1	0	0	0	1	0	0	0	1	0	1	1	1	1	1	1	0	1	1	0	1	0	1	0	1	0	0	1	1	1	1	1	0	0
GSM1213703	71.52	1	75.68	0	1	0	1	1	0	0	1	1	0	0	0	0	1	1	0	0	1	1	1	0	1	0	0	0	0	1	1	0	1	0	1	1	0	0	1	0	1	0	0	1	0	0	0	0	1
GSM1019304	43.7333	1	71	0	1	0	0	0	1	1	1	1	1	1	0	1	1	1	0	1	0	1	0	0	0	1	1	1	0	0	1	1	1	1	0	0	0	0	1	1	1	0	1	0	1	0	0	0	0
GSM1019196	0.2	1	51	1	2	1	0	0	1	0	0	1	1	1	1	0	1	1	1	0	1	0	0	1	0	0	1	0	0	0	0	1	1	1	0	1	0	1	1	0	0	0	0	0	0	1	1	0	1
GSM1019202	11.1333	1	54	0	3	0	0	0	0	0	1	0	0	1	0	0	0	0	1	1	0	1	0	1	0	0	0	1	1	1	1	1	1	0	0	0	1	1	0	1	0	1	1	0	1	1	1	1	0
GSM1213692	68.88	1	55.39	0	1	0	1	1	1	0	1	1	0	0	1	1	1	1	0	1	1	1	1	0	0	0	0	0	0	0	1	0	1	1	0	0	0	0	1	0	1	0	0	0	0	0	0	0	1
GSM1019260	78.3333	0	66	1	1	1	1	1	0	0	1	1	1	1	0	1	1	1	0	0	1	1	1	1	1	0	1	1	0	0	1	0	0	0	0	1	1	0	0	1	1	1	0	1	0	1	0	1	1
GSM1019332	33.8333	1	52	1	1	1	0	1	0	1	1	1	1	0	0	1	0	1	0	1	0	0	0	0	0	0	0	1	1	1	0	0	1	1	0	0	0	0	1	1	1	0	1	0	0	0	0	0	0
GSM1213749	38.4	1	78.26	1	1	1	0	0	1	0	0	1	0	0	1	0	1	0	1	0	1	0	0	0	1	1	1	0	0	0	0	1	1	0	1	1	1	1	0	0	0	1	0	0	1	1	1	0	1
GSM1019248	96.2667	0	56	1	4	1	0	1	1	1	1	0	1	1	0	1	1	0	0	1	0	0	1	0	0	1	1	1	1	1	1	1	1	1	0	0	0	0	1	0	1	0	1	1	0	1	1	0	0
GSM1213797	70.08	0	70.91	1	1	0	0	1	1	0	0	1	0	0	1	0	1	1	0	0	1	1	1	1	1	0	1	0	0	0	0	0	1	1	1	1	0	0	1	0	1	1	0	0	0	1	1	1	1
GSM1019261	76.9333	0	67	1	1	0	1	0	0	1	0	0	0	1	0	1	0	0	0	1	0	0	0	1	1	1	1	1	1	1	1	1	0	0	1	0	0	0	1	1	1	0	0	0	0	1	0	1	0
GSM1019321	173.567	0	67	0	1	0	0	1	0	1	1	1	1	1	1	0	1	1	0	1	0	0	1	1	1	0	0	1	1	1	0	0	0	0	0	1	1	0	0	1	1	1	1	1	0	0	0	1	0
GSM1213773	57.48	1	69.43	0	1	1	1	1	1	0	0	1	1	1	0	0	1	1	1	0	0	0	1	1	0	1	1	0	0	0	1	1	0	1	0	0	0	1	1	0	0	0	0	1	0	0	0	1	0
GSM1019326	182.3	0	83	0	1	0	0	1	0	1	0	1	0	1	1	1	0	1	1	1	0	1	0	0	1	0	1	1	1	1	1	0	1	0	0	1	1	1	0	1	0	1	1	0	0	1	0	1	0
GSM1019288	61.9667	0	56	1	1	1	0	0	0	0	1	0	0	0	1	0	1	1	0	0	1	0	1	0	1	1	0	0	0	0	0	0	1	1	0	0	1	0	1	1	1	1	0	1	0	0	0	0	1
GSM1213834	32.52	0	68.32	0	1	1	1	1	1	0	1	1	1	0	0	0	0	1	1	0	1	1	1	1	1	1	1	0	0	0	1	0	1	1	0	0	1	0	1	0	0	1	0	1	1	1	0	1	1
GSM1213818	40.56	0	84.95	0	2	1	1	0	1	0	1	1	0	0	1	0	1	1	0	0	1	1	0	0	1	0	0	0	0	0	1	1	1	0	1	1	0	1	1	0	1	0	0	0	0	1	1	0	1
GSM1019195	14.8	1	60	1	3	0	1	1	0	0	0	0	0	1	0	0	0	0	0	0	0	0	0	1	1	1	1	0	0	0	1	1	0	0	0	0	1	0	0	0	0	0	1	1	1	1	1	1	0
GSM1213801	48.48	1	76.94	1	2	0	1	0	0	0	1	1	0	1	0	1	1	1	1	1	0	1	0	0	1	1	1	0	1	1	1	1	0	0	0	0	1	0	0	1	0	1	1	0	0	0	0	1	0
GSM1213810	1.8	0	70.38	0	1	1	0	1	1	1	0	1	1	0	0	1	1	1	0	1	0	1	1	0	1	0	1	0	1	0	1	1	1	0	0	0	0	0	1	0	1	0	0	0	0	0	0	1	1
GSM1213809	15.24	0	78.58	0	1	0	0	0	0	0	0	1	0	0	0	0	1	1	0	0	1	1	1	0	0	0	1	0	0	0	0	1	1	1	1	1	0	0	1	0	1	0	0	0	0	0	0	1	1
GSM1213688	69.12	0	73.23	1	1	0	0	1	1	0	0	1	0	1	0	1	1	1	0	1	0	1	1	1	1	1	0	0	1	1	1	0	0	1	1	0	0	1	0	0	0	0	1	0	1	0	0	1	1
GSM1213836	15.12	0	55.53	0	2	1	1	0	0	0	0	0	0	0	1	1	0	0	1	1	0	0	0	1	0	1	0	1	0	0	0	1	0	0	1	1	0	1	1	0	0	1	0	0	1	0	1	0	1
GSM1213849	49.92	0	60.08	0	1	0	0	1	1	0	1	1	1	1	1	0	1	1	1	0	1	0	0	1	0	1	1	1	0	0	1	0	1	1	0	0	0	1	1	0	0	0	1	0	1	1	1	0	1
GSM1213762	10.32	1	57.68	0	2	1	1	0	0	1	1	0	1	0	1	1	0	0	1	1	0	0	0	1	1	1	0	1	1	0	1	1	0	0	1	1	1	0	0	1	0	1	1	1	1	1	1	0	0
GSM1213824	19.08	1	70.73	0	2	1	0	1	1	1	0	0	0	1	0	1	1	1	1	1	0	1	0	0	0	0	0	1	1	1	1	0	0	1	0	1	0	0	1	1	1	0	1	0	1	1	0	1	0
GSM1213760	54.84	0	78.11	0	1	0	1	0	0	1	1	0	0	1	1	1	0	0	1	1	1	0	0	1	1	0	0	1	1	1	0	0	0	0	0	1	1	1	1	1	1	1	1	0	1	1	1	0	1
GSM1213750	12.36	1	50.12	1	2	0	1	0	0	1	1	0	0	0	0	1	0	0	0	0	0	0	0	0	0	1	0	1	1	1	0	1	0	0	1	0	1	1	0	1	0	1	1	1	1	0	1	0	0
GSM1019194	94.8	1	57	0	2	0	1	0	0	0	0	1	0	0	0	0	0	0	0	0	1	0	1	1	1	0	0	0	0	0	0	1	0	0	1	1	1	1	0	0	0	1	0	1	0	0	1	1	1
GSM1213740	70.08	0	85.91	0	1	0	1	0	1	0	0	0	0	0	1	1	1	1	1	0	1	0	1	1	0	0	1	1	0	0	0	0	0	1	0	0	0	0	0	1	0	0	1	0	0	1	1	1	0
GSM1019220	17.7667	1	78	1	1	1	1	1	0	0	1	0	1	1	0	0	0	0	1	0	1	0	0	0	0	1	1	0	1	0	0	1	0	0	1	1	0	0	1	0	1	0	0	0	1	1	0	0	0
GSM1213746	62.04	0	60.79	1	1	0	1	0	0	0	1	0	0	0	1	0	0	0	1	0	0	0	0	1	0	0	1	0	0	0	0	0	0	1	1	1	0	0	0	0	1	0	0	0	0	0	0	0	1
GSM1019145	19.6667	1	67	1	1	0	1	0	0	0	1	0	1	0	1	0	0	0	0	1	0	0	1	0	0	1	1	1	0	1	0	1	0	0	1	1	1	1	1	0	1	1	1	1	1	0	1	0	1
GSM1213763	23.4	1	62.23	0	1	0	1	1	0	1	1	0	1	1	0	0	0	1	1	1	0	0	0	1	0	1	1	0	1	1	0	0	1	1	0	0	0	0	0	0	0	0	1	0	0	0	0	0	1
GSM1019295	158.667	0	47	0	2	1	0	0	0	0	1	1	1	0	0	1	1	1	0	0	0	0	0	1	1	1	1	0	0	0	1	0	0	1	1	1	0	1	1	1	1	0	0	0	0	0	0	0	0
GSM1213733	41.76	1	78.13	1	1	1	1	0	1	1	0	0	0	1	1	1	0	0	1	0	0	0	0	1	0	1	0	0	0	0	0	0	0	0	0	1	0	0	0	0	0	1	0	0	1	1	1	0	0
GSM1213833	6.72	1	68.95	0	1	0	0	1	0	0	0	0	1	0	0	1	1	1	0	1	0	1	1	1	0	1	1	0	1	1	1	0	0	1	0	0	0	0	1	1	1	0	1	1	1	1	0	1	0
GSM1213756	63.24	0	60.85	1	1	0	0	0	0	0	0	1	1	0	1	1	1	1	0	0	1	1	1	1	0	0	0	1	0	0	1	0	1	1	0	1	0	1	1	0	1	1	0	0	0	1	0	0	1
GSM1019293	22.0333	1	71	1	2	0	1	1	1	0	0	1	0	1	0	0	1	1	1	0	0	1	0	0	0	1	1	0	0	0	1	1	1	1	0	1	1	1	1	0	0	1	0	0	1	1	0	0	0
GSM1213727	69.48	1	49.24	1	2	0	0	0	0	1	1	0	1	1	1	1	0	1	1	1	1	0	0	1	1	0	1	1	0	0	0	1	0	1	0	0	1	1	0	1	0	0	1	1	0	1	0	0	1
GSM1213826	6.84	1	71.7	1	1	1	0	1	1	1	0	0	1	1	0	0	1	0	0	1	0	0	1	0	1	1	0	1	1	1	1	1	0	0	0	0	0	0	0	1	0	1	1	1	1	1	0	0	0
GSM1019314	163.233	0	73	1	1	0	0	0	1	0	1	1	1	0	0	1	1	1	0	0	1	1	1	0	1	0	1	1	0	1	0	0	0	1	0	0	0	0	0	1	1	0	0	1	0	0	0	0	1
GSM1019333	32.8333	1	73	0	1	1	0	1	1	1	0	0	0	1	0	1	0	0	0	1	0	1	1	0	0	1	0	0	1	1	1	0	0	0	0	0	0	0	1	1	0	0	1	0	0	1	0	1	1
GSM1213780	7.8	1	84.19	1	1	0	0	0	0	1	1	0	1	0	1	0	0	0	1	0	1	0	1	1	1	1	1	1	0	0	0	0	1	0	1	0	1	1	0	0	0	1	1	0	0	0	0	1	1
GSM1213737	35.4	0	64.19	0	1	0	0	0	0	0	0	1	0	0	0	0	1	0	1	1	0	1	1	1	0	1	1	0	1	1	1	1	0	0	1	0	0	0	1	0	1	0	0	1	0	0	0	0	0
GSM1019286	25.2	1	62	1	2	0	1	0	0	0	1	0	0	0	1	0	1	1	0	0	1	1	1	1	1	1	1	1	0	0	1	0	1	1	1	1	1	0	0	1	1	1	0	1	1	1	1	0	1
GSM1019217	12.3333	1	51	0	2	1	1	0	0	0	0	0	0	0	1	0	0	0	1	0	0	0	1	1	0	1	0	0	0	1	0	1	0	0	1	1	0	1	0	0	0	1	0	0	1	0	1	0	0
GSM1213671	87.84	0	69.15	1	1	1	0	1	1	0	0	1	0	0	1	0	1	1	0	1	1	1	1	0	1	0	0	0	1	1	1	0	0	1	1	0	0	0	1	1	1	0	0	0	0	0	0	1	1
GSM1213757	69	0	69.77	1	1	1	0	1	1	0	0	1	1	1	1	0	0	1	0	1	0	0	1	0	0	1	0	1	1	1	1	0	0	0	0	1	1	0	0	1	1	1	1	1	1	1	0	1	0
GSM1213775	37.68	1	70.52	1	1	0	0	0	1	1	1	0	0	1	0	1	1	1	0	1	0	0	1	0	0	1	1	1	1	1	1	1	0	1	1	0	0	0	1	1	1	0	0	0	0	0	0	0	0
GSM1019154	8.33333	1	59	1	3	1	1	1	0	1	0	0	1	0	1	1	0	0	0	1	1	0	0	0	0	0	1	1	1	1	1	0	0	1	0	0	0	0	1	1	1	0	1	1	0	1	1	1	1
GSM1019179	9.26667	1	59	1	1	1	1	1	1	1	0	0	1	0	1	0	0	1	1	0	0	1	0	1	0	1	1	0	0	1	1	1	0	1	1	0	1	1	0	1	0	0	0	1	1	1	1	0	0
GSM1213728	64.68	0	75.89	1	1	1	1	0	0	0	1	1	1	1	1	0	1	0	1	0	1	0	0	1	0	0	0	0	0	0	0	0	1	1	0	1	0	1	1	0	0	1	0	0	0	0	0	0	1
GSM1213677	74.64	0	44.21	0	1	1	0	1	0	1	0	0	0	1	1	1	0	0	0	1	0	0	0	0	1	1	1	1	1	1	1	0	1	0	0	0	1	1	0	1	0	1	1	1	1	1	1	1	0
GSM1019280	53.7333	1	60	1	1	0	0	1	0	0	1	0	0	1	0	1	1	0	0	0	0	1	0	0	1	0	0	1	1	1	1	0	1	1	1	1	0	1	0	1	0	0	0	1	0	0	0	1	1
GSM1019309	32.6333	1	75	0	3	0	0	0	0	0	1	1	0	1	1	0	1	1	1	0	1	1	1	0	1	0	0	0	0	0	0	0	1	0	1	0	0	0	0	0	1	1	0	1	0	0	0	0	1
GSM1213704	66.48	0	61.59	1	2	1	1	0	1	1	1	1	1	0	0	1	0	1	0	1	1	0	1	1	1	1	0	1	1	1	0	0	1	1	0	0	0	1	0	1	0	0	1	1	1	0	1	1	0
GSM1019269	52.1667	1	54	0	1	1	0	1	1	1	1	0	0	1	0	1	0	1	1	1	0	1	0	0	1	0	1	0	1	1	1	0	0	0	1	1	1	1	1	0	0	1	1	1	0	1	0	1	0
GSM1019262	79.5	0	63	0	4	1	0	0	0	0	0	0	0	0	0	0	1	0	1	0	1	1	1	0	1	0	0	0	0	0	0	1	1	0	1	0	0	1	0	0	0	1	0	0	0	0	0	0	1
GSM1213840	14.76	1	65.69	0	1	1	0	1	1	1	0	0	1	1	0	1	0	1	0	1	0	1	1	0	1	1	0	1	1	1	1	0	1	1	0	1	1	1	1	1	1	0	1	0	1	1	0	1	0
GSM1213844	54.48	0	70.62	1	1	1	0	1	1	1	1	1	1	0	1	1	0	0	1	0	1	0	0	1	1	1	0	1	0	0	1	1	1	0	1	1	1	1	0	0	0	1	0	1	0	0	1	1	1
GSM1019249	95.5333	0	64	0	2	1	0	0	1	0	1	1	0	0	1	0	1	1	1	0	1	1	1	0	1	0	1	0	0	0	1	1	0	1	1	1	0	0	1	0	1	0	0	0	1	0	0	0	1
GSM1019255	92.2333	0	78	1	1	0	1	1	0	0	1	0	0	1	0	1	1	0	1	1	0	1	0	0	1	0	0	1	1	1	1	1	1	1	0	0	0	1	1	1	0	1	0	0	0	0	0	1	0
GSM1019221	2.96667	1	66	1	3	1	1	0	0	1	0	0	0	1	1	1	0	0	1	0	0	1	0	1	1	0	0	1	1	1	1	1	1	1	1	0	1	1	0	0	0	1	1	1	0	1	1	1	0
GSM1019272	40.8	1	70	0	4	1	0	0	1	0	0	1	0	0	1	0	1	1	1	0	1	0	1	0	0	1	0	0	0	0	1	0	0	1	1	0	0	1	0	0	0	1	0	1	0	0	0	0	1
GSM1019231	67.0667	1	60	0	3	0	0	0	0	1	0	0	1	1	1	1	0	0	0	1	0	0	1	1	0	1	1	1	1	1	0	1	1	1	0	0	0	0	1	0	0	0	1	0	0	1	0	1	1
GSM1019180	11.4333	1	75	0	1	1	0	0	0	0	1	0	0	0	1	1	0	1	0	1	1	0	0	1	1	1	0	1	0	1	0	1	0	0	0	1	1	0	0	1	1	1	0	1	1	1	0	0	1
GSM1213751	58.92	0	49.86	0	1	0	0	0	1	0	1	0	0	0	1	0	0	0	1	0	1	0	0	0	1	1	0	0	0	0	0	1	1	0	1	1	1	0	0	0	0	0	0	0	1	0	1	0	1
GSM1213837	91.32	1	74.09	0	1	0	0	1	1	1	0	1	0	1	0	1	0	1	0	1	1	1	1	1	0	1	0	1	1	1	1	0	0	1	0	0	1	1	0	1	0	1	1	1	1	1	1	1	0
GSM1019327	30.4	1	57	0	1	1	0	0	1	1	0	1	0	0	1	1	0	0	0	0	0	0	1	0	0	1	1	0	0	1	0	1	0	1	1	0	0	1	1	1	1	1	1	0	1	0	0	1	1
GSM1213734	61.92	0	71.23	0	2	0	1	0	0	0	0	1	1	1	0	0	0	0	1	0	1	0	0	0	0	1	1	0	0	0	0	1	0	0	0	1	0	0	0	0	0	0	0	1	1	0	0	0	0
GSM1019257	39.6667	1	77	1	1	0	0	0	0	0	1	1	0	0	0	0	1	1	1	0	1	1	1	0	1	0	0	0	0	0	0	0	1	1	1	0	0	0	1	0	1	1	0	0	1	0	1	0	1
GSM1019139	106.2	0	71	1	2	0	0	0	1	0	0	1	0	0	1	0	1	1	1	0	1	0	1	0	0	0	0	0	0	0	0	1	1	1	1	0	0	0	1	0	1	0	0	0	0	1	1	0	1
GSM1019181	107.367	1	68	1	3	1	1	0	1	0	1	1	0	0	1	0	0	1	1	0	1	0	1	1	1	0	0	0	0	0	0	1	0	0	1	1	0	0	0	1	0	0	0	1	1	0	1	0	1
GSM1019160	2.8	1	55	0	1	0	1	0	0	1	0	0	1	1	0	0	0	0	0	0	0	0	1	0	0	1	1	1	1	1	0	1	0	0	0	0	0	1	1	1	1	1	1	1	0	1	0	1	1
GSM1213707	64.92	0	41.95	0	1	1	0	0	0	0	0	1	1	1	0	0	0	0	1	1	0	0	1	0	1	1	1	1	0	0	0	1	0	1	0	1	1	1	0	1	1	1	0	1	0	0	1	1	1
GSM1019313	168.767	0	76	0	1	0	0	1	0	0	0	0	0	0	0	0	1	0	1	0	0	1	1	0	1	1	0	0	0	0	1	0	0	0	0	0	1	0	0	0	0	1	1	0	1	0	1	1	1
GSM1213702	35.16	1	55.75	1	2	1	1	1	0	1	0	0	0	0	0	1	0	0	0	1	0	1	1	1	0	1	1	1	1	1	0	0	0	1	0	1	0	1	0	1	1	0	1	0	1	1	1	1	0
GSM1019143	18.5333	1	66	1	2	0	1	0	1	0	0	1	0	0	0	0	1	0	0	0	1	0	1	1	0	0	1	0	0	0	0	1	0	1	1	1	0	0	1	0	0	1	0	0	1	0	1	0	1
GSM1213807	8.52	0	69.92	1	2	0	1	0	0	0	1	0	1	1	0	1	0	0	1	1	0	1	0	1	0	1	0	1	1	1	1	1	1	1	1	1	0	1	0	1	0	0	1	1	1	0	0	0	0
GSM1019157	19.8	1	58	1	1	0	1	0	1	1	1	0	1	1	0	1	0	0	1	1	0	1	0	0	0	1	1	1	0	1	0	1	1	0	0	1	1	1	0	1	0	1	1	1	1	1	1	1	0
GSM1019210	91.6	1	66	1	1	1	1	1	1	1	0	0	1	0	1	0	0	0	1	1	1	1	0	1	1	1	1	1	1	1	1	1	1	0	1	1	1	1	0	0	1	1	0	1	1	0	1	0	0
GSM1019284	30.2	1	74	0	1	0	0	1	0	0	1	1	0	1	0	1	0	0	1	0	0	1	0	0	0	1	1	0	1	1	0	0	0	0	0	0	1	1	0	1	0	1	1	1	1	1	1	1	0
GSM1019273	48.7667	1	65	0	1	1	0	0	0	0	1	1	1	0	0	0	1	1	0	0	1	1	1	0	1	1	0	0	1	0	1	0	1	0	1	1	1	1	0	1	1	1	0	1	1	0	0	1	0
GSM1019184	14.3	1	51	0	1	0	1	0	0	1	0	1	0	0	1	1	0	1	1	1	0	0	0	0	0	1	0	1	1	1	1	0	0	1	0	0	1	1	0	1	0	1	1	1	1	1	1	1	0
GSM1019308	40.7	1	79	0	1	0	0	0	1	0	1	1	0	1	1	0	1	1	1	0	1	1	1	0	1	1	1	0	0	0	1	1	1	1	1	1	0	0	1	0	1	1	0	0	1	0	1	0	1
GSM1019215	106.733	1	59	1	1	1	1	0	0	0	0	0	0	1	1	1	0	0	1	1	0	1	0	0	0	0	0	1	1	1	1	1	0	0	1	0	1	1	0	0	0	1	1	1	1	1	1	1	0
GSM1213676	51.96	1	71.43	1	1	1	1	1	1	1	0	0	0	0	1	1	1	1	0	1	0	1	1	0	1	1	0	1	1	1	1	1	0	0	0	1	0	0	1	1	1	0	1	1	1	1	1	1	0
GSM1019291	24.2	1	49	1	1	0	1	1	1	0	0	1	0	1	0	1	1	1	0	1	0	1	0	1	0	1	0	1	1	1	1	0	1	1	0	1	0	1	0	1	1	1	1	0	1	1	0	0	0
GSM1213804	93.96	0	80.83	0	1	1	1	0	0	1	0	0	0	0	0	1	0	0	0	1	0	0	1	1	0	1	1	0	1	0	1	1	1	0	1	0	1	1	1	0	0	1	1	1	1	0	1	0	1
GSM1019278	69.7	0	55	1	1	0	0	0	0	1	0	1	0	1	0	1	1	1	0	1	0	1	0	0	1	1	1	0	0	0	1	0	1	0	1	1	1	1	0	0	0	1	1	0	1	0	0	0	0
GSM1019294	43.1	1	68	0	1	1	0	1	1	1	0	0	0	1	1	1	1	1	1	0	0	0	1	0	1	0	1	1	1	1	1	0	1	0	0	0	1	0	1	0	1	0	1	0	0	0	0	1	1
GSM1213716	52.44	1	73.57	1	1	1	0	1	0	1	0	0	0	1	1	1	0	0	0	1	0	1	0	0	1	1	1	1	0	1	1	0	1	0	0	0	1	0	0	1	0	1	1	1	1	1	1	1	0
GSM1213682	66.72	0	72.96	0	1	0	0	1	1	1	1	0	0	1	0	0	0	0	0	0	0	0	1	0	1	0	1	1	0	1	0	0	0	1	1	0	0	0	0	1	1	1	1	0	1	0	0	0	1
GSM1019287	60.2	0	72	1	4	0	1	1	1	1	0	0	1	1	0	1	0	0	1	1	1	0	1	1	1	1	0	1	1	0	0	0	1	1	0	1	1	0	1	1	1	1	1	0	1	1	1	1	1
GSM1213687	77.52	0	76.93	1	1	1	0	1	1	1	0	0	0	1	0	0	1	0	1	0	0	1	1	1	0	0	0	0	0	0	1	0	1	1	1	1	0	1	1	0	1	0	0	0	1	1	1	0	0
GSM1213726	78.72	0	83.65	0	2	1	1	0	1	1	0	1	0	0	1	0	0	0	1	0	1	1	1	0	1	1	0	0	0	0	1	0	1	0	1	1	1	1	1	0	1	0	0	0	0	1	1	0	0
GSM1213788	17.88	1	80.54	1	2	0	0	0	0	0	1	0	1	0	1	0	0	0	1	0	1	0	1	0	1	1	1	0	0	0	0	1	1	1	1	0	1	1	0	0	0	1	0	1	0	1	0	1	1
GSM1019296	26.4	1	47	0	2	1	0	1	0	1	0	0	0	1	0	1	1	1	1	0	0	1	1	0	0	1	1	0	1	0	0	0	1	0	1	0	1	1	0	1	0	1	0	1	0	1	1	1	0
GSM1213793	32.28	0	72.67	0	1	0	1	1	0	1	0	0	1	1	0	1	1	1	0	1	1	1	0	0	1	1	0	1	1	1	1	1	0	1	0	0	1	0	1	1	1	1	1	1	0	1	0	1	1
GSM1213742	63.12	1	80.76	1	2	1	0	0	0	1	1	0	1	1	1	0	0	0	1	1	1	0	1	1	1	0	0	1	0	1	1	0	0	0	0	1	1	1	0	1	0	1	1	1	1	1	1	1	1
GSM1213700	48.36	1	73.93	0	1	1	1	1	1	1	0	1	1	1	1	1	1	1	0	1	1	1	1	0	1	1	0	1	1	1	0	0	0	0	0	0	0	1	0	1	1	1	1	1	1	1	0	1	0
GSM1213803	18.48	0	73.69	1	1	1	1	0	0	0	0	0	1	1	0	1	0	0	1	1	1	0	0	0	1	0	0	1	1	1	0	0	0	0	0	1	1	0	0	0	0	1	1	1	1	1	1	0	0
GSM1019168	177.967	0	73	1	3	1	1	1	0	1	0	0	0	1	1	1	1	0	0	1	0	0	1	1	0	0	0	1	1	1	1	0	1	1	0	1	1	1	0	0	0	0	1	1	0	1	1	1	0
GSM1213670	90.24	0	68.15	0	1	0	0	1	1	1	1	1	0	0	0	0	1	1	0	1	1	1	1	0	1	0	0	1	1	1	1	0	0	1	0	0	0	0	1	1	1	1	1	0	0	0	0	1	0
GSM1019277	68.8667	0	54	1	1	1	0	1	1	1	0	0	1	1	0	1	0	0	0	1	0	1	1	0	1	0	0	1	1	1	1	0	1	0	0	1	1	1	1	1	1	1	1	0	1	1	0	1	0
GSM1019176	9.36667	1	82	0	1	0	1	0	1	0	0	1	1	0	0	0	0	0	1	0	1	0	0	1	1	0	1	0	0	0	0	1	1	0	1	1	0	0	0	0	0	0	0	1	0	0	1	0	1
GSM1019283	64.2667	0	74	0	3	0	0	1	1	0	1	1	1	1	1	0	1	1	1	0	1	1	1	0	0	1	0	0	0	0	0	0	0	1	0	0	0	0	0	1	1	1	1	0	1	0	1	0	1
GSM1019193	76.6667	1	65	0	1	1	0	1	1	1	1	1	1	1	1	1	0	0	1	1	1	1	1	1	0	1	0	1	1	1	1	1	0	0	0	1	0	1	1	0	1	0	0	1	0	0	1	0	0
GSM1213693	13.2	1	61.53	0	2	0	1	1	1	0	0	1	0	0	0	0	1	0	1	1	0	1	1	0	0	0	1	0	1	1	1	0	0	0	0	0	1	0	1	1	1	0	0	0	1	0	0	0	0
GSM1213717	58.92	1	63.41	1	1	0	1	0	0	0	1	0	1	1	1	1	0	0	1	1	0	0	0	1	1	0	0	1	1	1	0	1	0	0	0	1	1	1	0	1	0	1	1	1	1	1	1	1	0
GSM1213730	38.52	1	65.26	1	1	1	1	0	0	1	1	0	0	0	0	1	0	0	1	0	1	0	0	1	1	1	0	1	1	0	0	1	0	0	1	1	1	1	0	1	0	1	1	1	1	0	1	0	1
GSM1213681	63.84	0	70.56	0	1	1	1	0	1	1	1	1	1	0	1	1	0	0	1	0	0	0	1	0	0	1	1	0	0	0	0	1	0	1	1	1	1	1	0	0	0	1	0	1	1	0	1	0	0
GSM1019212	150.333	0	65	0	1	1	1	0	0	0	1	1	1	0	0	0	1	1	1	0	1	0	0	0	0	0	1	0	0	0	0	1	0	0	1	1	1	1	0	0	0	1	0	0	1	1	1	1	0
GSM1019211	10.7667	1	54	0	2	1	1	0	1	1	1	1	1	0	1	1	0	0	1	1	1	0	1	1	1	1	1	1	0	0	1	1	1	1	0	0	1	1	0	0	0	0	1	1	1	0	0	1	1
GSM1019209	58.7	1	67	1	1	1	0	1	0	1	1	1	1	1	0	0	0	0	1	1	1	1	0	1	0	1	1	0	0	0	0	1	0	0	0	1	1	1	0	0	0	1	0	0	1	0	1	0	0
GSM1213695	70.08	0	62.9	0	2	0	0	1	1	1	0	0	1	1	1	1	0	1	1	1	0	0	1	0	0	0	1	1	1	1	1	0	0	0	0	0	1	1	1	1	0	0	1	1	0	1	0	1	0
GSM1019174	17.1333	1	52	1	1	1	1	1	0	1	0	1	1	0	1	1	1	0	0	1	0	0	1	0	1	1	0	1	1	1	1	0	1	1	0	1	0	0	1	1	1	0	1	1	0	1	1	0	1
GSM1019271	72.5667	0	57	0	1	0	0	0	0	1	1	0	1	1	0	1	0	0	1	1	0	1	0	0	0	1	1	1	1	1	1	0	0	1	1	0	1	1	0	1	0	1	1	0	1	1	0	0	0
GSM1213831	61.56	0	76.71	1	2	1	0	0	0	0	0	0	0	0	1	1	1	0	1	0	1	0	1	0	0	0	0	0	0	0	0	1	0	1	1	0	0	0	1	0	1	1	0	1	1	1	1	0	0
GSM1019246	44.7667	1	70	1	1	0	0	1	0	0	1	1	1	1	0	1	1	1	1	0	1	1	1	0	1	0	1	0	0	0	0	0	1	0	1	1	1	1	1	1	1	1	0	0	1	0	1	0	1
GSM1213759	65.88	0	49.41	1	1	1	0	1	1	1	0	0	1	1	1	1	0	0	0	1	1	0	1	1	1	1	0	1	1	1	1	1	0	0	0	0	1	0	1	1	1	1	1	1	0	1	0	1	1
GSM1213720	76.44	0	67.6	1	1	1	0	0	0	1	0	0	0	0	0	1	0	0	0	0	0	0	1	0	1	0	0	1	0	0	0	0	0	0	1	1	1	0	1	0	1	1	0	1	0	1	1	1	1
GSM1019331	21.3333	1	67	1	1	1	0	1	1	1	0	1	0	1	0	1	0	0	1	1	0	1	1	1	1	0	1	1	1	1	1	0	1	0	0	0	1	0	0	0	0	0	1	1	0	1	0	0	0
GSM1213774	36.12	1	68.25	1	2	1	0	1	1	0	1	1	1	1	0	0	1	1	1	1	1	1	1	0	1	1	0	1	1	1	1	0	0	0	0	0	1	1	1	1	1	1	1	1	0	1	0	1	1
GSM1213754	24.24	1	72.96	1	2	1	0	1	0	0	0	0	1	0	1	0	1	0	0	0	0	1	1	0	1	1	0	1	1	1	0	1	0	0	0	1	1	1	0	1	1	1	1	1	1	0	0	1	1
GSM1213848	1.2	1	76.25	0	2	1	1	1	1	1	1	0	1	1	1	1	0	1	1	1	1	0	1	0	1	1	1	1	1	1	1	0	1	1	0	0	1	1	1	1	0	0	1	0	1	1	1	1	0
GSM1213819	18.24	1	75.7	1	1	1	0	1	0	1	0	1	1	1	1	1	0	0	1	1	0	1	0	0	1	1	0	1	1	1	1	0	1	0	0	0	1	1	0	1	0	1	1	1	1	1	1	1	0
GSM1213723	31.32	1	79.65	1	2	0	1	0	0	0	1	0	1	1	0	1	0	0	1	0	1	0	0	0	1	0	1	0	0	0	0	1	0	1	0	1	1	0	0	1	0	1	1	1	1	0	0	0	0
GSM1019328	37.1	1	49	0	2	1	0	1	1	1	1	1	1	1	1	1	0	1	1	1	1	0	1	1	1	1	0	1	1	0	0	0	0	0	1	0	1	1	0	1	1	1	1	1	1	1	1	1	1
GSM1213698	67.56	1	69.59	0	2	0	1	1	0	0	1	0	1	0	0	0	1	1	1	1	0	1	1	1	0	0	1	0	1	1	1	0	0	0	0	1	1	1	0	1	1	0	1	0	0	0	0	0	0
GSM1019265	77.2	0	59	0	3	0	0	1	1	1	1	1	1	1	1	0	1	1	1	1	0	0	1	0	1	0	0	1	1	1	1	0	0	1	0	0	0	1	1	1	1	1	0	1	0	0	0	1	1
GSM1213691	76.68	0	78.99	1	1	1	1	1	0	1	0	0	1	1	1	1	0	0	0	1	0	1	1	0	1	0	0	1	1	1	1	0	0	0	0	0	1	1	1	1	1	0	1	0	1	1	0	0	0
GSM1019142	105.267	0	56	0	1	1	1	1	1	1	1	1	1	0	1	0	1	1	0	1	1	1	0	1	1	1	0	1	1	1	1	1	0	1	1	1	1	1	1	1	0	0	1	0	0	0	0	1	0
GSM1213680	71.88	0	59.01	0	1	1	0	1	1	1	0	0	0	1	1	1	0	1	1	1	0	1	1	0	1	1	0	1	1	1	1	0	1	1	0	0	1	0	1	1	0	0	1	1	1	1	0	1	0
GSM1213816	1.08	0	70.56	1	2	1	1	0	0	1	1	0	1	1	0	1	0	0	1	1	0	0	0	1	1	0	0	1	1	1	1	1	1	0	1	1	1	1	0	1	0	1	1	1	1	0	0	0	0
GSM1213673	22.92	1	68	1	1	0	1	1	0	1	1	1	1	1	0	1	1	0	0	1	0	1	1	1	0	1	0	1	1	1	1	0	0	0	1	0	1	1	0	1	0	1	1	1	0	0	0	1	1
GSM1213686	34.08	1	85.78	1	1	0	1	1	1	1	0	0	0	0	1	1	0	1	0	1	0	0	1	0	1	0	0	1	1	1	0	0	1	0	1	1	1	0	0	1	1	1	1	1	1	1	1	1	0
GSM1019191	3.26667	1	53	1	1	0	1	0	0	0	0	0	0	1	0	0	1	0	1	0	0	0	1	1	0	0	0	0	0	0	1	1	0	0	0	0	1	1	0	1	0	0	0	1	1	1	0	0	0
GSM1213722	15	1	68.87	0	1	1	1	0	0	0	1	1	1	0	1	1	0	0	1	1	0	0	0	1	1	0	0	1	0	1	0	1	1	0	0	1	1	1	0	1	0	1	1	1	1	0	1	1	0
GSM1213678	48.96	1	74.16	0	2	0	1	1	0	0	1	1	0	0	0	0	0	1	0	1	1	1	0	1	1	1	0	1	0	1	1	0	0	1	0	0	1	1	1	1	1	0	1	1	1	0	1	1	1
GSM1213683	60.24	0	79.28	1	1	1	1	1	1	0	0	1	1	0	1	0	1	0	0	0	0	1	1	0	1	0	0	0	0	1	0	1	0	0	1	1	1	1	1	0	1	0	0	0	0	0	0	0	0
GSM1213672	82.08	0	82.36	0	1	0	0	1	1	1	0	1	0	0	1	1	1	1	1	1	0	1	1	1	1	1	0	1	0	1	1	0	0	1	0	1	1	1	1	1	1	1	0	0	0	1	0	0	0
GSM1213783	7.2	1	83.58	0	1	0	1	0	0	1	1	1	1	1	1	1	0	0	1	0	1	0	0	1	0	1	0	1	0	0	0	1	0	0	1	1	1	1	0	1	0	1	1	1	1	0	1	1	0
GSM1019182	132.433	0	49	0	1	1	1	1	1	1	0	0	0	1	0	1	0	0	1	0	0	0	1	1	0	1	1	1	1	1	1	1	1	1	1	0	0	1	1	0	0	0	0	1	0	1	0	0	1
GSM1213820	22.92	1	67.62	0	1	0	1	1	0	0	1	0	0	1	1	1	1	0	1	1	0	1	0	0	1	1	0	1	1	1	1	1	0	1	0	1	0	0	1	1	1	1	1	0	1	0	0	1	0
GSM1019263	25.2667	1	74	0	1	0	0	1	1	1	0	1	0	1	0	1	0	0	1	1	0	1	1	0	1	1	0	1	1	1	1	0	0	0	0	1	1	1	0	1	0	1	1	0	1	1	0	1	0
GSM1019156	5.26667	1	78	1	1	1	1	1	0	1	1	1	1	0	1	0	1	1	1	1	1	1	0	1	1	1	0	1	1	1	0	0	0	0	0	1	1	1	0	1	1	1	1	1	1	1	1	1	0
GSM1213812	9.6	1	62.17	1	2	0	1	1	0	1	1	0	1	1	0	1	0	0	1	1	0	0	0	1	1	1	1	1	1	1	0	0	1	1	0	1	1	1	0	1	0	1	1	1	1	1	0	1	0
GSM1213735	72.72	0	68.14	0	1	1	1	1	1	1	0	1	1	1	0	1	0	1	0	1	0	0	1	0	1	1	0	1	1	1	0	0	0	0	0	0	0	1	1	1	0	0	1	1	0	1	0	1	0
GSM1213814	61.2	0	70.82	0	1	1	0	1	1	1	1	1	1	0	1	1	1	1	1	1	1	1	1	0	1	1	1	0	1	1	1	0	1	1	0	0	0	1	1	1	1	1	1	1	1	1	1	1	0
GSM1019306	41.6667	1	74	1	2	0	0	1	0	1	1	1	1	1	1	1	0	0	1	1	1	1	1	0	1	1	0	0	1	1	0	0	0	0	0	0	1	1	0	0	1	1	1	1	1	0	0	1	0
GSM1019319	6.03333	1	70	1	1	0	0	1	1	1	1	1	0	0	1	1	1	1	1	1	0	1	1	1	1	1	0	0	1	1	0	0	0	0	0	0	1	1	0	1	0	0	1	1	0	0	0	1	0
GSM1213806	20.52	0	69.03	1	1	1	0	0	0	1	1	0	1	1	1	1	0	1	1	1	1	0	1	0	1	0	0	1	1	1	0	1	1	1	0	1	1	1	0	1	0	0	1	1	1	1	0	1	0
GSM1213736	10.92	1	54.09	0	1	1	0	0	0	1	1	0	1	1	0	0	1	1	1	1	1	1	1	1	1	1	0	0	0	1	1	1	0	0	0	0	1	1	0	1	0	1	1	1	1	1	0	1	0
GSM1213792	35.04	1	79.62	0	1	1	1	0	0	1	1	1	0	0	1	1	0	1	1	0	1	0	1	0	1	0	1	0	0	0	0	1	1	1	1	1	1	1	0	0	0	0	0	1	0	1	1	0	1
GSM1213805	72.24	0	47.09	1	1	0	0	1	0	0	1	1	1	1	0	1	0	1	1	1	1	0	1	0	1	1	1	0	1	1	1	0	0	1	0	0	1	1	0	1	0	1	1	0	1	1	0	1	0
GSM1213710	3.96	0	67.56	1	2	0	1	1	0	1	1	1	1	1	0	1	1	1	1	1	0	0	1	0	1	0	0	1	1	1	1	1	0	1	0	1	1	0	0	1	0	0	1	1	0	1	0	1	0
GSM1019325	23.9333	1	40	0	1	0	1	1	1	1	1	1	1	0	1	1	1	1	1	1	0	1	1	0	1	1	0	0	1	1	0	0	0	0	0	1	1	1	0	1	0	0	1	1	1	0	0	1	0
[truncated: 39 more columns]
